# Supplementary material for: Skin microcirculatory reactivity assessed using a thermal challenge is decreased in patients with circulatory shock and associated with outcome
Source: Springer Nature journal article supplement (doi:10.1186/s13613-018-0393-7), 2018-05-03
Supplement: MOESM1 [file 15737062]

# Skin Microcirculatory Reactivity Assessed using a Thermal Challenge is Decreased in Patients with Circulatory Shock and Associated with Outcome

Orbegozo et al

## Additional File 1

**Figure S1.** Schematic representation of a thermal challenge during skin blood flow (SBF) monitoring with skin laser Doppler (SLD). Positions for the probes in healthy volunteers are marked as A (forearm) and B (palm). In patients with circulatory shock, all measurements were performed at A.

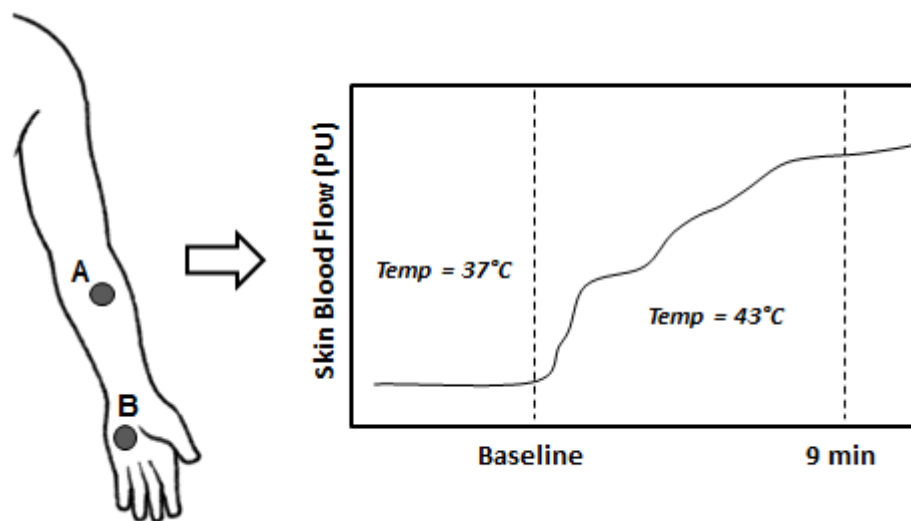

**Table S1.** Main characteristics of healthy volunteers

| Variable                             | Result  |
|--------------------------------------|---------|
| Subjects [n]                         | 18      |
| Male [n (%)]                         | 12 (67) |
| Age (years)                          | 39 ± 12 |
| Body mass index (Kg/m <sup>2</sup> ) | 24 ± 3  |
| Heart rate (beats per min)           | 68 ± 7  |
| Mean arterial pressure (mmHg)        | 88 ± 10 |
| SpO <sub>2</sub> (%)                 | 98 ± 2  |

**Table S2.** Comparison of skin laser Doppler (SLD) variables in the healthy volunteers on the forearm and hand

| SLD Variable              | Forearm             | Hand                 | P     |
|---------------------------|---------------------|----------------------|-------|
| Skin Blood Flow 37°C (PU) | 10.3 (8.0-14.2)     | 94.5 (57.2-130.0)    | <0.01 |
| Skin Blood Flow 43°C (PU) | 112.8 (88.0-150.0)* | 201.5 (132.0-255.0)* | <0.01 |
| Skin Blood Flow Ratio     | 11.2 (9.4-13.4)     | 2.0 (1.7-2.6)        | <0.01 |

\* = p < 0.05 compared with baseline values at 37°C

**Figure S2.** Comparison of the skin blood flow (SBF) ratio after 48 hours in 20 patients

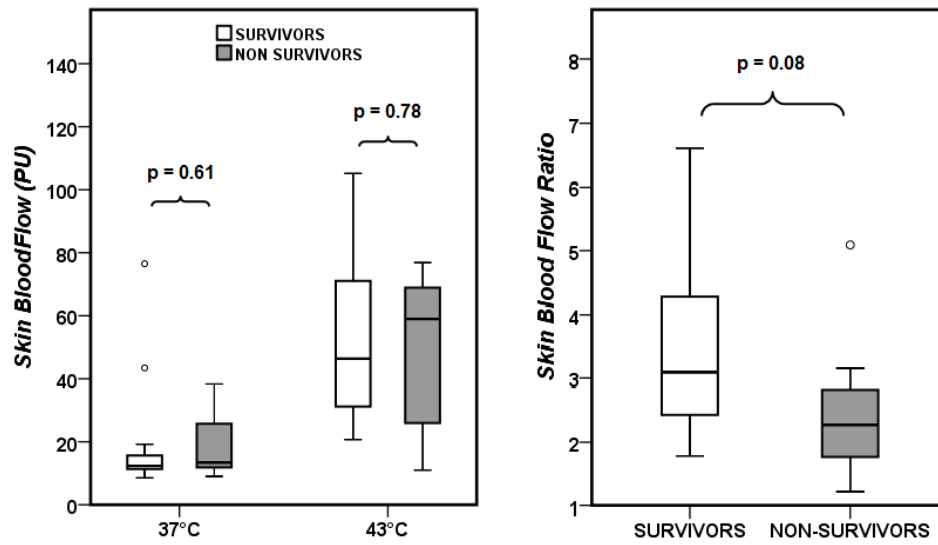

**Figure S3.** Comparison of the evolution between T0 and T48 in the 20 patients with two measurements (p values calculated using a 2 way ANOVA analysis)

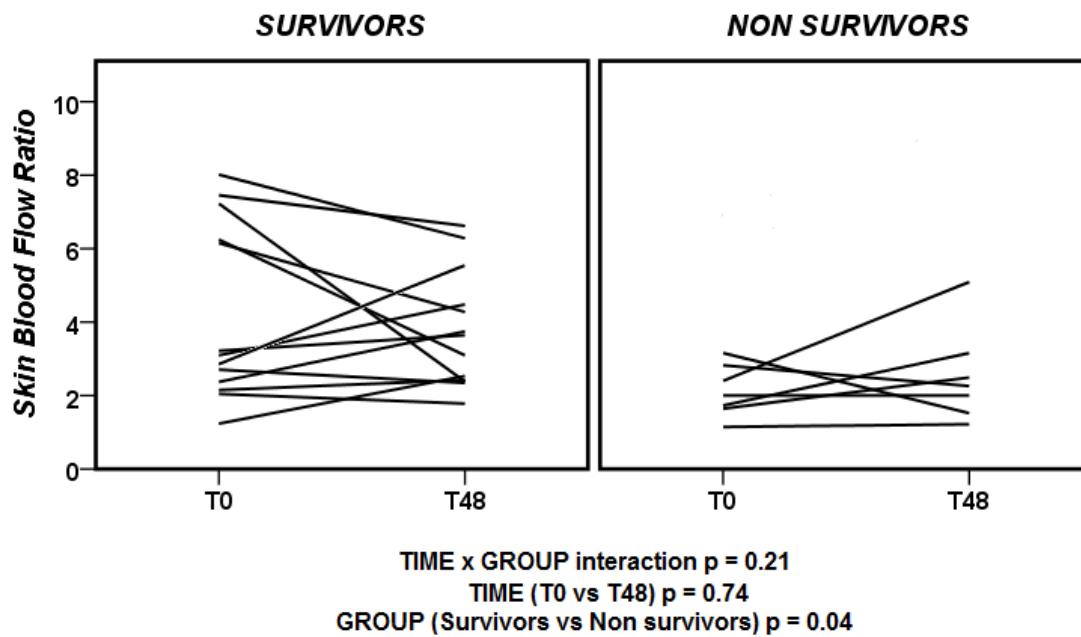

**Figure S4.** Correlation of norepinephrine dose and arterial lactate concentration with the skin blood flow (SBF) ratio in the patients with circulatory shock.

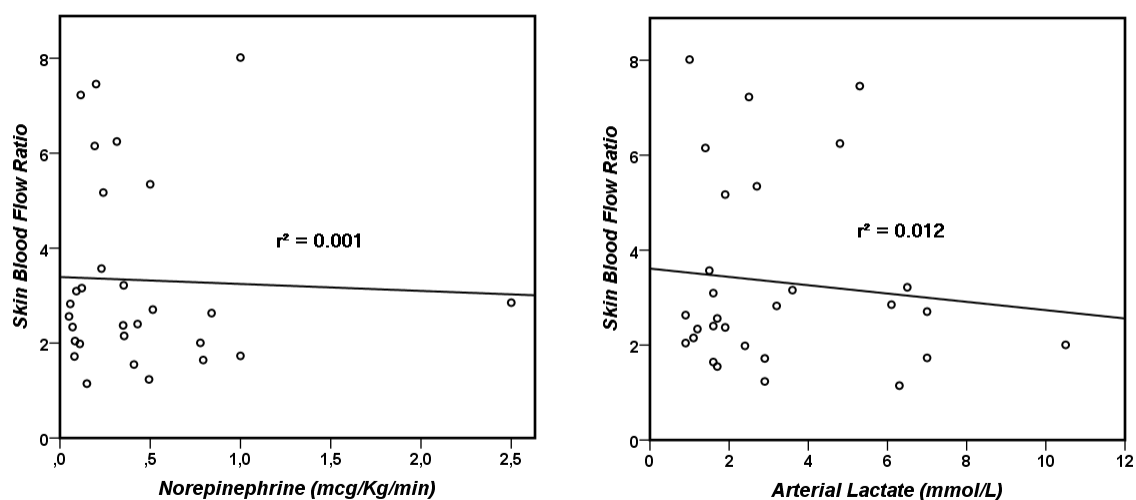

**Table S3.** Comparison of skin laser Doppler (SLD) variables in septic and non-septic patients

| SLD Variable                 | INITIAL COHORT      |                     |      | CONFIRMATORY COHORT |                     |      |
|------------------------------|---------------------|---------------------|------|---------------------|---------------------|------|
|                              | SEPSIS<br>(n=15)    | NO SEPSIS<br>(n=14) | P    | SEPSIS<br>(n=28)    | NO SEPSIS<br>(n=7)  | P    |
| Skin Blood Flow 37°C<br>(PU) | 13.6<br>(12.2-22.8) | 11.7<br>(10.0-19.5) | 0.69 | 12.9<br>(8.6-18.3)  | 13.0<br>(9.7-22.5)  | 0.81 |
| Skin Blood Flow 43°C<br>(PU) | 39.0<br>(25.7-76.9) | 34.4<br>(23.8-77.1) | 0.91 | 40.4<br>(22.2-54.5) | 41.5<br>(31.7-80.3) | 0.34 |
| Skin Blood Flow<br>Ratio     | 2.4<br>(2.0-5.3)    | 2.8<br>(1.7-3.6)    | 0.83 | 2.6<br>(1.9-4.3)    | 3.3<br>(1.8-3.7)    | 0.43 |

**Figure S5.** Correlation of central, forearm (before heating to 37°C) and central minus forearm temperature with the skin blood flow (SBF) ratio in the patients with circulatory shock

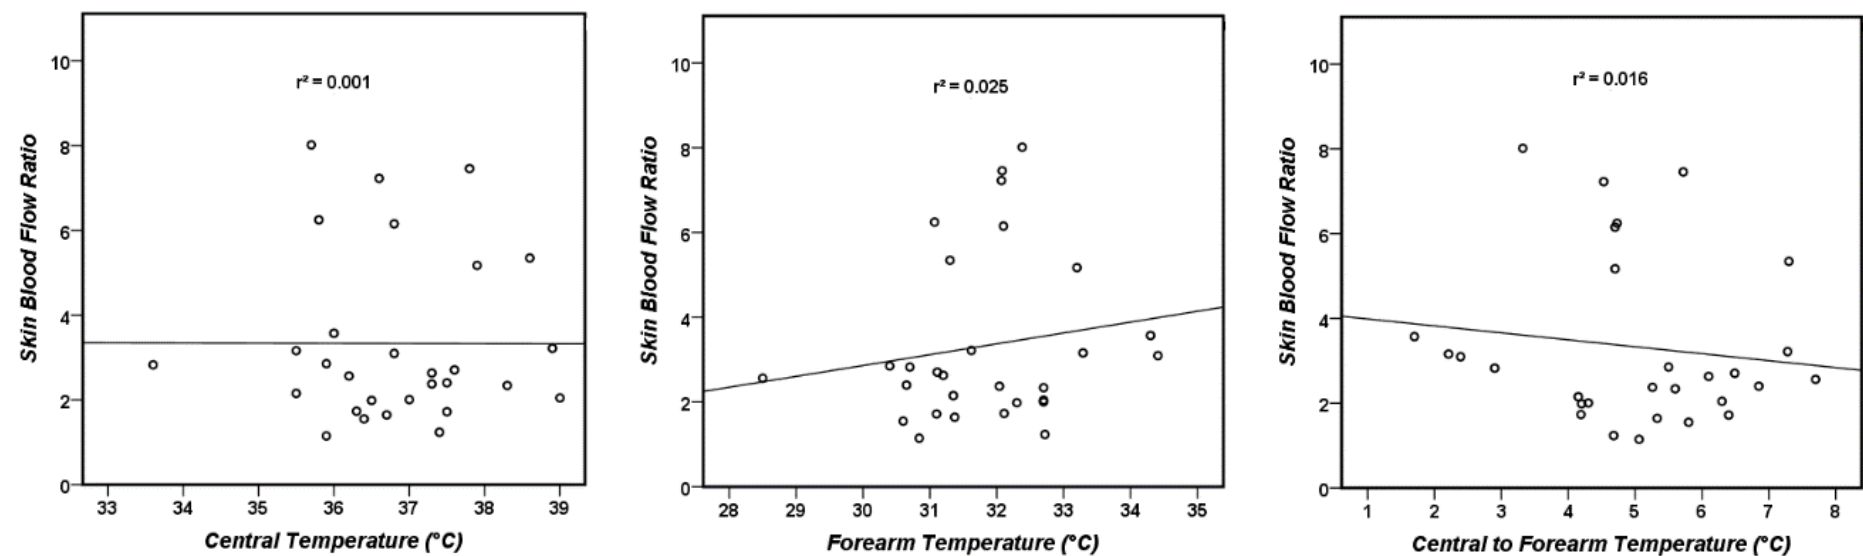

**Table S4.** Univariate and multivariable analysis of variables to predict ICU mortality

| Type of analysis                 | Variable               | OR    | 95% CI       | P     |
|----------------------------------|------------------------|-------|--------------|-------|
| Univariate analysis              | Lactate                | 1.259 | 0.903-1.753  | 0.174 |
|                                  | Mean arterial pressure | 1.024 | 0.964-1.089  | 0.438 |
|                                  | Norepinephrine dose    | 5.451 | 0.530-56.077 | 0.154 |
|                                  | Sepsis                 | 1.200 | 0.267-5.400  | 0.812 |
|                                  | SOFA score             | 1.344 | 1.001-1.805  | 0.049 |
|                                  | Skin blood flow ratio  | 0.447 | 0.192-1.039  | 0.061 |
|                                  | APACHE II score        | 1.149 | 0.999-1.320  | 0.051 |
| Multivariable analysis (Model 1) | SOFA score             | 1.161 | 0.772-1.747  | 0.473 |
|                                  | Skin blood flow ratio  | 0.122 | 0.015-0.993  | 0.049 |
|                                  | APACHE II score        | 1.369 | 1.033-1.815  | 0.029 |
| Multivariable analysis (Model 2) | Skin blood flow ratio  | 0.123 | 0.015-0.981  | 0.048 |
|                                  | APACHE II score        | 1.386 | 1.059-1.813  | 0.017 |

Model 1: Considers all variables with  $p < 0.1$  in the univariate analysis. [Consider all variables simultaneously].

Model 2: Considers all variables with  $p < 0.1$  in the univariate analysis and also other relevant clinical and hemodynamic variables (lactate, mean arterial pressure, norepinephrine dose, sepsis). [Backward stepwise selection and removal of variables based on the probability of the likelihood ratio statistic].
